# Supplementary material for: Survival of Floquet–Bloch States in the Presence of Scattering
Source: PubMed Central journal article supplement — Nano Lett. 2021 Jun 4;21(12):5028–35. doi: 10.1021/acs.nanolett.1c00801 (PMC8227476; doi:10.1021/acs.nanolett.1c00801), 2021-06-04
Supplement: nl1c00801_si_001.pdf [file nl1c00801_si_001.pdf]

# Survival of Floquet-Bloch States in the Presence of Scattering

Sven Aeschlimann, Shunsuke A. Sato, Razvan Krause, Mariana Chávez-Cervantes, Umberto De Giovannini, Hannes Hübener, Stiven Forti, Camilla Coletti, Kerstin Hanff, Kai Rossnagel, Angel Rubio, and Isabella Gierz\*

E-mail: isabella.gierz@ur.de

## Supporting Information

### Sample Growth

Bulk 2H-WSe<sub>2</sub> samples were grown via standard chemical vapor transport reactions.<sup>1,2</sup> For the growth of monolayer epitaxial graphene 6H-SiC wafers were graphitized in a modified Aixtron Black Magic reactor in Ar atmosphere at atmospheric pressure<sup>3</sup> using the parameters reported in Ref.<sup>4</sup> The resulting graphene samples were n-doped with the Fermi level  $\sim 0.4$  eV above the Dirac point. After growth all samples were transported in air and inserted into ultra-high vacuum for the tr-ARPES experiments. In order to obtain a clean surface the WSe<sub>2</sub> samples were cleaved *in situ* using Kapton tape and the graphene samples were annealed at a temperature of 800°C for 5 min.

### Time- and Angle-Resolved Photoemission Spectroscopy (tr-ARPES)

We used a commercial Titanium:Sapphire amplifier (Legend Elite Duo from Coherent) delivering 35 fs pulses at a wavelength of 790 nm with a repetition rate of 1 kHz to gener-

ate femtosecond mid-infrared (MIR) pump and extreme ultraviolet (XUV) probe pulses. 10 mJ of output power were sent into a commercial optical parametric amplifier (HE-TOPAS from Light Conversion) where the fundamental of the laser was converted into signal and idler pulses at  $1.34\ \mu\text{m}$  and  $1.92\ \mu\text{m}$ , respectively. These pulses were overlapped on a GaSe crystal for difference frequency generation (DFG) of the pump pulse at  $\lambda_{\text{drive}} = 4.45\ \mu\text{m}$  ( $\hbar\omega_{\text{drive}} = 280\ \text{meV}$ ,  $T_{\text{drive}} = 15\ \text{fs}$ ). In order to block signal and idler pulses and to reduce the spectral width of the pump pulse the pump was sent through a bandpass filter centered at  $4.45\ \mu\text{m}$  with a full width at half maximum (FWHM) of 200 nm. The pump was then focused with a  $\text{CaF}_2$  lens, yielding a pump fluence of  $\sim 2\ \text{mJ}/\text{cm}^2$  at the focus. The polarization of the pump pulse was controlled with a combination of  $\lambda/2$  and  $\lambda/4$  waveplates.

XUV probe pulses were generated from the second harmonic of the remaining 2 mJ of output power by high harmonics generation in Argon. The 7th harmonic at  $\hbar\omega_{\text{probe}} = 21.7\ \text{eV}$  was selected with a time-preserving grating monochromator<sup>5</sup> and focused onto the sample with a toroidal mirror. P-polarized XUV pulses were used to eject photoelectrons from the sample. The photocurrent as a function of kinetic energy and emission angle of the photoelectrons was measured with a hemispherical analyzer (Phoibos 100 from SPECS). The signal on the two-dimensional detector was converted into snapshots of the energy and momentum dependent spectral function  $A(E, \vec{k}_{\parallel})$  of the material under investigation. The energy resolution was 150 meV.

From the Gaussian full width at half maximum (FWHM) of the temporal profile of the replica band intensity we extract a pump-probe cross correlation of 300 fs. With a nominal XUV probe pulse duration of 120 fs we obtain a pump pulse duration of 270 fs. Therefore, the experimental conditions satisfy  $\text{FWHM}_{\text{drive}} > \text{FWHM}_{\text{probe}} > T_{\text{drive}}$ , where  $T_{\text{drive}} = 15\ \text{fs}$  is the period of the pump, required for the experimental observation of replica bands in periodically driven solids.<sup>6</sup>

From the experimental fluence of  $2\ \text{mJ}/\text{cm}^2$  and the driving pulse duration of 270 fs we obtain a peak field strength of  $E_{\text{vac}} = 2.4\ \text{MV}/\text{cm}$  at the focus in vacuum. The field

strength in the surface of the sample was calculated via  $E_{\text{sample}} = 2E_{\text{vac}}/(1 + \sqrt{\epsilon_{\infty}})$  where  $\epsilon_{\infty} = 6.7$  for SiC<sup>7</sup> and  $\epsilon_{\infty} = 15.6$  for WSe<sub>2</sub>.<sup>8</sup> Note that the dielectric constant for epitaxial graphene on SiC(0001) remains controversial with values ranging from  $\epsilon_{\infty} = 22$ <sup>9</sup> to  $\epsilon_{\infty} = 7.26$ .<sup>10</sup> We would like to stress that using a different value of  $\epsilon_{\infty}$  for our TDDFT simulations induces quantitative but no qualitative changes in the calculated ARPES spectra. Hence, the agreement with experiment cannot be improved by simply adapting the dielectric constant.

## Data Analysis

The experimental EDCs at negative pump-probe delay were fitted with the following function

$$f(E) = \left( \sum_n \text{Peak}(E, E_n, w_n) + \text{BG}_{\text{Shirley}} \right) f_{\text{FD}}(E, \mu, T) \quad (1)$$

where Peak is either a Lorentzian or a Gaussian,  $E_n$  and  $w_n$  are peak position and full width at half maximum, respectively,  $\text{BG}_{\text{Shirley}}$  is the Shirley background,  $f_{\text{FD}}$  is the Fermi-Dirac distribution,  $\mu$  is the chemical potential, and  $T$  is the electronic temperature. The replica bands in the presence of the driving pulse were included like this

$$F = (1 - 2a)f(E) + af(E - \hbar\omega_{\text{drive}}) + af(E + \hbar\omega_{\text{drive}}) \quad (2)$$

where  $a$  is the intensity of the replica bands, and  $\omega_{\text{drive}}$  is the driving frequency.

## Time-Dependent Density Functional Theory (TDDFT)

We compute the photoemission spectra using density-functional theory as implemented in the Octopus code.<sup>11</sup> In this method the time evolution of an electronic structure under the influence of pump and probe lasers in the dipole approximation is computed by propagating the Kohn-Sham equations in time.<sup>12,13</sup> The photoelectron spectrum is then obtained from the flux of ionised electronic states through an analyser surface placed at an appropriate distance away from the surface.<sup>14</sup> The electronic structure of WSe<sub>2</sub> and graphene was obtained using

the local density approximation for the DFT exchange-correlation potential and HGH pseudo potentials.<sup>15</sup> The states of WSe<sub>2</sub> and graphene were represented in the unit cell on a real space grid with a spacing of 0.4 Bohr and 0.36 Bohr, respectively, and with k-point samplings of  $6 \times 6 \times 1$  and  $12 \times 12 \times 1$ . In both cases the time evolution was evaluated with steps of 0.002 fs and the analyser surface was placed at 90 Bohr from the surface of the material. A complex absorbing boundary with a width of 30 Bohr<sup>16</sup> was used to prevent unphysical rescattering.

## Photon-Dressed States

Unfortunately, it is impossible to disentangle Volkov and Floquet-Bloch contributions to the replica band intensity of a photoelectron spectrum using TDDFT. Therefore, in order to calculate the intensity of the  $n$ th order Volkov replica band, we use the model from Madsen.<sup>17</sup> This model also includes the contribution of the ponderomotive energy  $U_p$  which is neglected in the more recent model from Park et al.<sup>18</sup> In Madsen's model<sup>17</sup> the normalized intensity of the  $n$ th order Volkov replica band is given by

$$I_n/I_0 \propto J_n^2 \left( \vec{\alpha} \vec{q}_f, \frac{U_p}{2\omega_{\text{drive}}} \right) \quad (3)$$

where  $\vec{\alpha} = \vec{A}/\omega_{\text{drive}}$ ,  $\vec{q}_f$  is the momentum of the photoelectron, and  $U_p = A^2/4$  is the ponderomotive energy. The generalized Bessel functions  $J_n(u, v)$  have the following property:

$$J_n(u, v) = \sum_{k=-\infty}^{\infty} J_{n-2k}(u) J_k(v). \quad (4)$$

Also,  $J_n(0) = 0$  for  $n \neq 0$  and  $J_0(0) = 1$ . With  $u = \vec{\alpha} \vec{q}_f = 0$  (which is the case for sp driving pulses in the present study) and  $v = \frac{U_p}{2\omega}$  we get

$$J_n(0, v) = \sum_{k=-\infty}^{\infty} J_{n-2k}(0) J_k(v) \quad (5)$$

$$J_{n=2k}(0, v) = \sum_{k=-\infty}^{\infty} J_0(0) J_k(v) \quad (6)$$

$$= \sum_{k=-\infty}^{\infty} J_k(v) \quad (7)$$

where we used that  $J_{n-2k}(0) \neq 0$  only if  $n = 2k$ . This means that, if  $\vec{\alpha}\vec{q}_f = 0$ , we will only get even-order Volkov replica bands. Hence, the Volkov contribution to the first order replica band is zero. Therefore, any first-order replica band that we observe in tr-ARPES using sp driving pulses necessarily needs to be a Floquet-Bloch state.

## References

- (1) Traving, M.; Boehme, M.; Kipp, L.; Skibowski, M.; Starrost, F.; Krasovskii, E. E.; Perlov, A.; Schattke, W. Electronic structure of WSe<sub>2</sub>: A combined photoemission and inverse photoemission study. *Phys. Rev. B* **1997**, *55*, 10392–10399.
- (2) Buck, J.; Iwicki, J.; Rossnagel, K.; Kipp, L. Surface photovoltage effect at the p-WSe<sub>2</sub>:Rb surface: Photoemission experiment and numerical model. *Phys. Rev. B* **2011**, *83*, 075312.
- (3) Emtsev, K. V.; Bostwick, A.; Horn, K.; Jobst, J.; Kellogg, G. L.; Ley, L.; McChesney, J. L.; Ohta, T.; Reshanov, S. A.; Röhrl, J.; Rotenberg, E.; Schmid, A. K.; Waldmann, D.; Weber, H. B.; Seyller, T. Towards wafer-size graphene layers by atmospheric pressure graphitization of silicon carbide. *Nature Materials* **2009**, *8*, 203.
- (4) Rossi, A.; Büch, H.; Rienzo, C. D.; Miseikis, V.; Convertino, D.; Al-Temimy, A.; Voliani, V.; Gemmi, M.; Piazza, V.; Coletti, C. Scalable synthesis of WS<sub>2</sub> on graphene

- and h-BN: an all-2D platform for light-matter transduction. *2D Materials* **2016**, *3*, 031013.
- (5) Poletto, L.; Frassetto, F. Time-preserving grating monochromators for ultrafast extreme-ultraviolet pulses. *Appl. Opt.* **2010**, *49*, 5465–5473.
- (6) Sentef, M.; Claassen, M.; Kemper, A.; Moritz, B.; Oka, T.; Freericks, J.; Devereaux, T. Theory of Floquet band formation and local pseudospin textures in pump-probe photoemission of graphene. *Nature Communications* **2014**, *6*, 7047.
- (7) Patrick, L.; Choyke, W. J. Static Dielectric Constant of SiC. *Phys. Rev. B* **1970**, *2*, 2255–2256.
- (8) Laturia, A.; Van de Put, M. L.; Vandenberghe, W. G. Dielectric properties of hexagonal boron nitride and transition metal dichalcogenides: from monolayer to bulk. *npj 2D Materials and Application* **2018**, *2*, 6.
- (9) Walter, A. L.; Bostwick, A.; Jeon, K.-J.; Speck, F.; Ostler, M.; Seyller, T.; Moreschini, L.; Chang, Y. J.; Polini, M.; Asgari, R.; MacDonald, A. H.; Horn, K.; Rotenberg, E. Effective screening and the plasmaron bands in graphene. *Phys. Rev. B* **2011**, *84*, 085410.
- (10) Hwang, C.; Siegel, D. A.; Mo, S.-K.; Regan, W.; Ismach, A.; Zhang, Y.; Zettl, A.; Lanzara, A. Fermi velocity engineering in graphene by substrate modification. *Scientific Reports* **2012**, *2*, 590.
- (11) Tancogne-Dejean, N. et al. Octopus, a computational framework for exploring light-driven phenomena and quantum dynamics in extended and finite systems. *The Journal of Chemical Physics* **2020**, *152*, 124119.
- (12) Kohn, W.; Sham, L. J. Self-Consistent Equations Including Exchange and Correlation Effects. *Phys. Rev.* **1965**, *140*, A1133–A1138.

- (13) Runge, E.; Gross, E. K. U. Density-Functional Theory for Time-Dependent Systems. *Phys. Rev. Lett.* **1984**, *52*, 997–1000.
- (14) De Giovannini, U.; Hübener, H.; Rubio, A. A First-Principles Time-Dependent Density Functional Theory Framework for Spin and Time-Resolved Angular-Resolved Photoelectron Spectroscopy in Periodic Systems. *J. Chem. Theory Comput.* **2017**, *13*, 265.
- (15) Hartwigsen, C.; Goedecker, S.; Hutter, J. Relativistic separable dual-space Gaussian pseudopotentials from H to Rn. *Phys. Rev. B* **1998**, *58*, 3641–3662.
- (16) De Giovannini, Umberto,; Larsen, Ask Hjorth,; Rubio, Angel, Modeling electron dynamics coupled to continuum states in finite volumes with absorbing boundaries. *Eur. Phys. J. B* **2015**, *88*, 56.
- (17) Madsen, L. B. Strong-field approximation in laser-assisted dynamics. *American Journal of Physics* **2005**, *73*, 57–62.
- (18) Park, S. T. Interference in Floquet-Volkov transitions. *Phys. Rev. A* **2014**, *90*, 013420.
